# Supplementary material for: Alpha-Fetoprotein Detection of Hepatocellular Carcinoma Leads to a Standardized Analysis of Dynamic AFP to Improve Screening Based Detection
Source: PLoS One. 2016 Jun 16;11(6):e0156801. doi: 10.1371/journal.pone.0156801 (PMC4911090; doi:10.1371/journal.pone.0156801)
Supplement: S4 Table — (DOCX) [file pone.0156801.s006.docx]

**S4 Table: Lothian sub-cohort of patients with at least six AFPs**: support for linearity based on all AFPs or windowed-in on the most recent six AFPs. N30 refers to the number of patients with evidence of linearity (R2≥30).
